# Supplementary material for: A Multimodal Deep Learning-based Platform that Assists in the Classification of Lupus Subtypes and Differential Diagnosis Among Lupus and Other Similar Skin Diseases
Source: Research Square preprint supplement (doi:10.21203/rs.3.rs-939556/v1), 2021-10-04
Supplement: Supplementary file 1 [file 68c34e15a1540d94102cbdd4.pdf]

**Table 1 | The MI-CLAIM checklist****Before paper submission**

| <b>Study design (Part 1)</b>                                                                                                                                          | <b>Completed: page number</b>                                              | <b>Notes if not completed</b> |
|-----------------------------------------------------------------------------------------------------------------------------------------------------------------------|----------------------------------------------------------------------------|-------------------------------|
| The clinical problem in which the model will be employed is clearly detailed in the paper.                                                                            | <input type="checkbox"/> Page 3 (Abstract), Page 5 (Introduction)          |                               |
| The research question is clearly stated.                                                                                                                              | <input type="checkbox"/> Page 3 (Abstract), Page 5 (Introduction)          |                               |
| The characteristics of the cohorts (training and test sets) are detailed in the text.                                                                                 | <input type="checkbox"/> Extended data table3 (Online Supplemental Tables) |                               |
| The cohorts (training and test sets) are shown to be representative of real-world clinical settings.                                                                  | <input type="checkbox"/> Page 1. Dataset (Online Supplemental Methods)     |                               |
| The state-of-the-art solution used as a baseline for comparison has been identified and detailed.                                                                     | <input type="checkbox"/> Page 5 (Introduction), Page13-15 (Results)        |                               |
| <b>Data and optimization (Parts 2, 3)</b>                                                                                                                             | <b>Completed: page number</b>                                              | <b>Notes if not completed</b> |
| The origin of the data is described and the original format is detailed in the paper.                                                                                 | <input type="checkbox"/> Page 1. Dataset (Online Supplemental Methods)     |                               |
| Transformations of the data before it is applied to the proposed model are described.                                                                                 | <input type="checkbox"/> Page 3-6 (Online Supplemental Methods)            |                               |
| The independence between training and test sets has been proven in the paper.                                                                                         | <input type="checkbox"/> Page 3 (Online Supplemental Methods)              |                               |
| Details on the models that were evaluated and the code developed to select the best model are provided.                                                               | <input type="checkbox"/> Page 8 (Online Supplemental Methods)              |                               |
| Is the input data type structured or unstructured?                                                                                                                    | <input type="checkbox"/> Structured <input type="checkbox"/> Unstructured  |                               |
| <b>Model performance (Part 4)</b>                                                                                                                                     | <b>Completed: page number</b>                                              | <b>Notes if not completed</b> |
| The primary metric selected to evaluate algorithm performance (e.g., AUC, F-score, etc.), including the justification for selection, has been clearly stated.         | <input type="checkbox"/> Page 8 (Online Supplemental Methods)              |                               |
| The primary metric selected to evaluate the clinical utility of the model (e.g., PPV, NNT, etc.), including the justification for selection, has been clearly stated. | <input type="checkbox"/> Page 9 (Online Supplemental Methods)              |                               |
| The performance comparison between baseline and proposed model is presented with the appropriate statistical significance.                                            | <input type="checkbox"/> Page 5 (Introduction), Page13-15 (Results)        |                               |
| <b>Model examination (Part 5)</b>                                                                                                                                     | <b>Completed: page number</b>                                              | <b>Notes if not completed</b> |
| Examination technique 1 <sup>a</sup>                                                                                                                                  | <input type="checkbox"/> Page 10 (Results)                                 |                               |
| Examination technique 2 <sup>a</sup>                                                                                                                                  | <input type="checkbox"/> Page 12 (Results)                                 |                               |
| A discussion of the relevance of the examination results with respect to model/algorithm performance is presented.                                                    | <input type="checkbox"/> Page 9 (Results)                                  |                               |
| A discussion of the feasibility and significance of model interpretability at the case level if examination methods are uninterpretable is presented.                 | <input type="checkbox"/> Page 8 (Online Supplemental Methods)              |                               |
| A discussion of the reliability and robustness of the model as the underlying data distribution shifts is included.                                                   | <input checked="" type="checkbox"/> Not completed                          |                               |
| <b>Reproducibility (Part 6): choose appropriate tier of transparency</b>                                                                                              | <b>Notes</b>                                                               |                               |
| Tier 1: complete sharing of the code                                                                                                                                  | <input type="checkbox"/>                                                   |                               |
| Tier 2: allow a third party to evaluate the code for accuracy/fairness; share the results of this evaluation                                                          | <input type="checkbox"/>                                                   |                               |
| Tier 3: release of a virtual machine (binary) for running the code on new data without sharing its details                                                            | <input type="checkbox"/>                                                   |                               |
| Tier 4: no sharing                                                                                                                                                    | <input type="checkbox"/>                                                   |                               |

PPV, positive predictive value; NNT, numbers needed to treat. <sup>a</sup>Common examination approaches based on study type: for studies involving exclusively structured data, coefficients and sensitivity analysis are often appropriate; for studies involving unstructured data in the domains of image analysis or natural language processing, saliency maps (or equivalents) and sensitivity analyses are often appropriate.
