# Supplementary material for: A Multimodal Deep Learning-based Platform that Assists in the Classification of Lupus Subtypes and Differential Diagnosis Among Lupus and Other Similar Skin Diseases
Source: Research Square preprint supplement (doi:10.21203/rs.3.rs-939556/v1), 2021-10-04
Supplement: Supplementary file 2 [file 27e0bf9ca5c5fc21ed5b5e49.docx]

**Supplemental Tables**

| **Institutions** |
| --- |
| Department of Dermatology, Beijing Chao-yang Hospital, Capital Medical University |
| Department of Dermatology, Peking University Third Hospital |
| Department of Dermatology, Pekng University People's Hospital |
| Department of Dermatology, People's Hospital of Tibet Autonomous Region |
| Department of Dermatology, People's Hospital of Xinjiang Uygur Autonomous Region |
| Department of Dermatology, Peking Union Medical College Hospital, Chinese Academy of Medical Science and Peking Union Medical College |
| Department of Dermatology, Sun Yat-sen Memorial Hospital, Sun Yat-sen University |
| Department of Dermatology, The Affiliated Hospital of Guizhou Medical University |
| Department of Dermatology, The First Affiliated Hospital of Chongqing Medical University |
| Department of Dermatology, The First Affiliated Hospital of Guangxi Medical University |
| Department of Dermatology, The First Bethune Hospital of Jilin University |
| Department of Dermatology, The First Hospital of Shanxi Medical University |
| Department of Dermatology, The Hei Long Jiang Provincial Hospital |
| Department of Dermatology, The Second Affiliated Hospital of Kunming Medical University |
| Department of Dermatology, The Second Affiliated Hospital, Zhejiang University School of Medicine |
| Department of Dermatology, The Second Xiangya Hospital of Central South University |
| Department of Dermatology, The Third Xiangya Hospital, Central South University |
| Department of Dermatology, West China Hospital, Sichuan University |
| Department of Dermatology, Wuhan No.1 Hospital |
| Department of Dermatology, Wuhan Union Hospital of China |
| Department of Dermatology, Xijing Hospital |
| Department of Dermatology, Xinhua Hospital Affiliated to Shanghai Jiao Tong University School of Medicine |
| Dermatology Hospital of Southern Medical University |
| Hainan Provincial Hospital of Skin Disease |
| Institute of Dermatology, Chinese Academy of Medical Sciences and Peking Union Medical College |

**Extended Data Table 1 | The list of participating hospitals in China**

|  | Clinical images | | | | |  | Clinical images & ACR scores | | | | |  | IHC images | | | | |  | IHC images & ACR scores | | | | |  | Clinical imags & IHC images | | | | |  | Clinical images & IHC images & ACR scores | | | | |
| --- | --- | --- | --- | --- | --- | --- | --- | --- | --- | --- | --- | --- | --- | --- | --- | --- | --- | --- | --- | --- | --- | --- | --- | --- | --- | --- | --- | --- | --- | --- | --- | --- | --- | --- | --- |
| Category | Sen | Spe | Pre | F1 | AUC |  | Sen | Spe | Pre | F1 | AUC |  | Sen | Spe | Pre | F1 | AUC |  | Sen | Spe | Pre | F1 | AUC |  | Sen | Spe | Pre | F1 | AUC |  | Sen | Spe | Pre | F1 | AUC |
| 0HC | 1.0000 | 0.9969 | 0.9333 | 0.9655 | 0.9993 |  | 0.7500 | 0.9937 | 0.8400 | 0.7925 | 0.9984 |  | 1.0000 | 0.9969 | 0.9333 | 0.9655 | 1.0000 |  | 1.0000 | 0.9984 | 0.9655 | 0.9825 | 0.9999 |  | 1.0000 | 1.0000 | 1.0000 | 1.0000 | 1.0000 |  | 1.0000 | 1.0000 | 1.0000 | 1.0000 | 1.0000 |
| 1DLE | 0.4127 | 0.9586 | 0.5098 | 0.4561 | 0.9156 |  | 0.4286 | 0.9652 | 0.5625 | 0.4865 | 0.9397 |  | 0.9206 | 0.9917 | 0.9206 | 0.9206 | 0.9942 |  | 0.9206 | 0.9801 | 0.8286 | 0.8722 | 0.9821 |  | 0.9841 | 0.9967 | 0.9688 | 0.9764 | 0.9996 |  | 1.0000 | 0.9967 | 0.9692 | 0.9844 | 0.9994 |
| 2A-SCLE | 0.3898 | 0.9918 | 0.8214 | 0.5287 | 0.9199 |  | 0.6271 | 0.9984 | 0.9737 | 0.7629 | 0.9873 |  | 0.5254 | 0.9704 | 0.6327 | 0.5741 | 0.9424 |  | 0.6102 | 0.9704 | 0.6667 | 0.6372 | 0.9582 |  | 0.6949 | 0.9918 | 0.8913 | 0.7810 | 0.9808 |  | 0.8644 | 0.9868 | 0.8644 | 0.8644 | 0.9780 |
| 3P-SCLE | 0.1429 | 0.9804 | 0.4000 | 0.2105 | 0.8950 |  | 0.3036 | 0.9558 | 0.3864 | 0.3400 | 0.9075 |  | 0.7321 | 0.9624 | 0.6406 | 0.6833 | 0.9452 |  | 0.7500 | 0.9722 | 0.7119 | 0.7304 | 0.9530 |  | 0.6607 | 0.9869 | 0.8222 | 0.7327 | 0.9549 |  | 0.7321 | 0.9902 | 0.8723 | 0.7961 | 0.9753 |
| 4SLE | 0.7867 | 0.9139 | 0.5364 | 0.6378 | 0.9087 |  | 0.9867 | 0.9375 | 0.6667 | 0.7957 | 0.9970 |  | 0.6800 | 0.9645 | 0.7083 | 0.6939 | 0.9525 |  | 0.8533 | 0.9696 | 0.7805 | 0.8153 | 0.9887 |  | 0.8800 | 0.9426 | 0.6600 | 0.7543 | 0.9768 |  | 0.9467 | 0.9730 | 0.8161 | 0.8765 | 0.9952 |
| 5LP | 0.8600 | 0.9708 | 0.7049 | 0.7748 | 0.9690 |  | 0.9000 | 0.9660 | 0.6818 | 0.7759 | 0.9867 |  | 0.9400 | 0.9919 | 0.9038 | 0.9216 | 0.9905 |  | 0.9400 | 0.9935 | 0.9216 | 0.9307 | 0.9966 |  | 0.9600 | 0.9951 | 0.9412 | 0.9505 | 0.9991 |  | 0.9600 | 0.9887 | 0.8727 | 0.9143 | 0.9989 |
| 6EAC | 0.7647 | 0.9659 | 0.6500 | 0.7027 | 0.9747 |  | 0.7647 | 0.9935 | 0.9070 | 0.8298 | 0.9589 |  | 0.8431 | 0.9740 | 0.7288 | 0.7818 | 0.9842 |  | 0.9216 | 0.9789 | 0.7833 | 0.8468 | 0.9883 |  | 0.9608 | 1.0000 | 1.0000 | 0.9800 | 0.9989 |  | 0.9608 | 1.0000 | 1.0000 | 0.9800 | 0.9998 |
| 7EM | 0.8780 | 0.9840 | 0.7826 | 0.8276 | 0.9967 |  | 0.8780 | 0.9776 | 0.7200 | 0.7912 | 0.9923 |  | 0.5854 | 0.9936 | 0.8571 | 0.6957 | 0.9437 |  | 0.6341 | 0.9936 | 0.8667 | 0.7324 | 0.9478 |  | 0.9756 | 0.9936 | 0.9091 | 0.9412 | 0.9995 |  | 0.9756 | 0.9952 | 0.9302 | 0.9524 | 0.9996 |
| 8Pso | 0.9016 | 0.9736 | 0.7746 | 0.8333 | 0.9699 |  | 0.9508 | 0.9967 | 0.9667 | 0.9587 | 0.9934 |  | 0.8197 | 0.9851 | 0.8475 | 0.8333 | 0.9870 |  | 0.9016 | 0.9769 | 0.7971 | 0.8462 | 0.9922 |  | 1.0000 | 0.9785 | 0.8243 | 0.9037 | 1.0000 |  | 1.0000 | 0.9686 | 0.7625 | 0.8652 | 0.9994 |
| 9Ecz | 0.7407 | 0.9772 | 0.7407 | 0.7407 | 0.9620 |  | 0.5556 | 0.9853 | 0.7692 | 0.6452 | 0.9539 |  | 0.7037 | 0.9739 | 0.7037 | 0.7037 | 0.9776 |  | 0.6481 | 0.9837 | 0.7778 | 0.7071 | 0.9748 |  | 0.7963 | 1.0000 | 1.0000 | 0.8866 | 0.9989 |  | 0.5741 | 1.0000 | 1.0000 | 0.7294 | 0.9944 |
| 10Vas | 0.8947 | 0.9730 | 0.6667 | 0.7640 | 0.9886 |  | 1.0000 | 0.9730 | 0.6909 | 0.8172 | 0.9893 |  | 0.8158 | 0.9889 | 0.8158 | 0.8158 | 0.9803 |  | 0.8421 | 0.9968 | 0.9412 | 0.8889 | 0.9673 |  | 0.9211 | 1.0000 | 1.0000 | 0.9589 | 0.9995 |  | 0.9211 | 1.0000 | 1.0000 | 0.9589 | 0.9990 |
| 11Ros | 1.0000 | 1.0000 | 1.0000 | 1.0000 | 0.9989 |  | 0.9767 | 1.0000 | 1.0000 | 0.9882 | 0.9998 |  | 0.8837 | 0.9920 | 0.8837 | 0.8837 | 0.9953 |  | 0.8372 | 0.9936 | 0.9000 | 0.8675 | 0.9921 |  | 0.9767 | 0.9984 | 0.9767 | 0.9767 | 0.9999 |  | 1.0000 | 0.9984 | 0.9773 | 0.9885 | 0.9999 |
| 12DM | 0.7500 | 0.9903 | 0.8571 | 0.8000 | 0.9281 |  | 0.7500 | 0.9838 | 0.7826 | 0.7660 | 0.9754 |  | 0.8125 | 0.9725 | 0.6964 | 0.7500 | 0.9856 |  | 0.7708 | 0.9887 | 0.8409 | 0.8043 | 0.9851 |  | 0.8958 | 0.9968 | 0.9556 | 0.9247 | 0.9981 |  | 0.9167 | 1.0000 | 1.0000 | 0.9565 | 0.9995 |
| Ave | 0.7325 | 0.9751 | 0.7214 | 0.7109 | 0.9560 |  | 0.7594 | 0.9790 | 0.7652 | 0.7500 | 0.9755 |  | 0.7894 | 0.9814 | 0.7902 | 0.7864 | 0.9759 |  | 0.8177 | 0.9843 | 0.8294 | 0.8201 | 0.9795 |  | 0.9005 | 0.9908 | 0.9192 | 0.9051 | 0.9931 |  | 0.9116 | 0.9921 | 0.9281 | 0.9128 | 0.9956 |

**Extended Data Table 2 | Sensitivity, specificity, precision, F1 score and AUC for single-modal, dual-modal and MMDLS 13 classifications.**
