# Supplementary material for: A Multimodal Deep Learning-based Platform that Assists in the Classification of Lupus Subtypes and Differential Diagnosis Among Lupus and Other Similar Skin Diseases
Source: Research Square preprint supplement (doi:10.21203/rs.3.rs-939556/v1), 2021-10-04
Supplement: Supplementary file 5 [file 6653a2aed7697005ae1865f6.docx]

**Supplemental Tables**

| **Institutions** |
| --- |
| Department of Dermatology, Beijing Chao-yang Hospital, Capital Medical University |
| Department of Dermatology, Peking University Third Hospital |
| Department of Dermatology, Pekng University People's Hospital |
| Department of Dermatology, People's Hospital of Tibet Autonomous Region |
| Department of Dermatology, People's Hospital of Xinjiang Uygur Autonomous Region |
| Department of Dermatology, Peking Union Medical College Hospital, Chinese Academy of Medical Science and Peking Union Medical College |
| Department of Dermatology, Sun Yat-sen Memorial Hospital, Sun Yat-sen University |
| Department of Dermatology, The Affiliated Hospital of Guizhou Medical University |
| Department of Dermatology, The First Affiliated Hospital of Chongqing Medical University |
| Department of Dermatology, The First Affiliated Hospital of Guangxi Medical University |
| Department of Dermatology, The First Bethune Hospital of Jilin University |
| Department of Dermatology, The First Hospital of Shanxi Medical University |
| Department of Dermatology, The Hei Long Jiang Provincial Hospital |
| Department of Dermatology, The Second Affiliated Hospital of Kunming Medical University |
| Department of Dermatology, The Second Affiliated Hospital, Zhejiang University School of Medicine |
| Department of Dermatology, The Second Xiangya Hospital of Central South University |
| Department of Dermatology, The Third Xiangya Hospital, Central South University |
| Department of Dermatology, West China Hospital, Sichuan University |
| Department of Dermatology, Wuhan No.1 Hospital |
| Department of Dermatology, Wuhan Union Hospital of China |
| Department of Dermatology, Xijing Hospital |
| Department of Dermatology, Xinhua Hospital Affiliated to Shanghai Jiao Tong University School of Medicine |
| Dermatology Hospital of Southern Medical University |
| Hainan Provincial Hospital of Skin Disease |
| Institute of Dermatology, Chinese Academy of Medical Sciences and Peking Union Medical College |

**Extended Data Table 1 | The list of participating hospitals in China**

|  | Clinical images | | | | |  | Clinical images & ACR scores | | | | |  | IHC images | | | | |  | IHC images & ACR scores | | | | |  | Clinical imags & IHC images | | | | |  | Clinical images & IHC images & ACR scores | | | | |
| --- | --- | --- | --- | --- | --- | --- | --- | --- | --- | --- | --- | --- | --- | --- | --- | --- | --- | --- | --- | --- | --- | --- | --- | --- | --- | --- | --- | --- | --- | --- | --- | --- | --- | --- | --- |
| Category | Sen | Spe | Pre | F1 | AUC |  | Sen | Spe | Pre | F1 | AUC |  | Sen | Spe | Pre | F1 | AUC |  | Sen | Spe | Pre | F1 | AUC |  | Sen | Spe | Pre | F1 | AUC |  | Sen | Spe | Pre | F1 | AUC |
| 0HC | 1.0000 | 0.9969 | 0.9333 | 0.9655 | 0.9993 |  | 0.7500 | 0.9937 | 0.8400 | 0.7925 | 0.9984 |  | 1.0000 | 0.9969 | 0.9333 | 0.9655 | 1.0000 |  | 1.0000 | 0.9984 | 0.9655 | 0.9825 | 0.9999 |  | 1.0000 | 1.0000 | 1.0000 | 1.0000 | 1.0000 |  | 1.0000 | 1.0000 | 1.0000 | 1.0000 | 1.0000 |
| 1DLE | 0.4127 | 0.9586 | 0.5098 | 0.4561 | 0.9156 |  | 0.4286 | 0.9652 | 0.5625 | 0.4865 | 0.9397 |  | 0.9206 | 0.9917 | 0.9206 | 0.9206 | 0.9942 |  | 0.9206 | 0.9801 | 0.8286 | 0.8722 | 0.9821 |  | 0.9841 | 0.9967 | 0.9688 | 0.9764 | 0.9996 |  | 1.0000 | 0.9967 | 0.9692 | 0.9844 | 0.9994 |
| 2A-SCLE | 0.3898 | 0.9918 | 0.8214 | 0.5287 | 0.9199 |  | 0.6271 | 0.9984 | 0.9737 | 0.7629 | 0.9873 |  | 0.5254 | 0.9704 | 0.6327 | 0.5741 | 0.9424 |  | 0.6102 | 0.9704 | 0.6667 | 0.6372 | 0.9582 |  | 0.6949 | 0.9918 | 0.8913 | 0.7810 | 0.9808 |  | 0.8644 | 0.9868 | 0.8644 | 0.8644 | 0.9780 |
| 3P-SCLE | 0.1429 | 0.9804 | 0.4000 | 0.2105 | 0.8950 |  | 0.3036 | 0.9558 | 0.3864 | 0.3400 | 0.9075 |  | 0.7321 | 0.9624 | 0.6406 | 0.6833 | 0.9452 |  | 0.7500 | 0.9722 | 0.7119 | 0.7304 | 0.9530 |  | 0.6607 | 0.9869 | 0.8222 | 0.7327 | 0.9549 |  | 0.7321 | 0.9902 | 0.8723 | 0.7961 | 0.9753 |
| 4SLE | 0.7867 | 0.9139 | 0.5364 | 0.6378 | 0.9087 |  | 0.9867 | 0.9375 | 0.6667 | 0.7957 | 0.9970 |  | 0.6800 | 0.9645 | 0.7083 | 0.6939 | 0.9525 |  | 0.8533 | 0.9696 | 0.7805 | 0.8153 | 0.9887 |  | 0.8800 | 0.9426 | 0.6600 | 0.7543 | 0.9768 |  | 0.9467 | 0.9730 | 0.8161 | 0.8765 | 0.9952 |
| 5LP | 0.8600 | 0.9708 | 0.7049 | 0.7748 | 0.9690 |  | 0.9000 | 0.9660 | 0.6818 | 0.7759 | 0.9867 |  | 0.9400 | 0.9919 | 0.9038 | 0.9216 | 0.9905 |  | 0.9400 | 0.9935 | 0.9216 | 0.9307 | 0.9966 |  | 0.9600 | 0.9951 | 0.9412 | 0.9505 | 0.9991 |  | 0.9600 | 0.9887 | 0.8727 | 0.9143 | 0.9989 |
| 6EAC | 0.7647 | 0.9659 | 0.6500 | 0.7027 | 0.9747 |  | 0.7647 | 0.9935 | 0.9070 | 0.8298 | 0.9589 |  | 0.8431 | 0.9740 | 0.7288 | 0.7818 | 0.9842 |  | 0.9216 | 0.9789 | 0.7833 | 0.8468 | 0.9883 |  | 0.9608 | 1.0000 | 1.0000 | 0.9800 | 0.9989 |  | 0.9608 | 1.0000 | 1.0000 | 0.9800 | 0.9998 |
| 7EM | 0.8780 | 0.9840 | 0.7826 | 0.8276 | 0.9967 |  | 0.8780 | 0.9776 | 0.7200 | 0.7912 | 0.9923 |  | 0.5854 | 0.9936 | 0.8571 | 0.6957 | 0.9437 |  | 0.6341 | 0.9936 | 0.8667 | 0.7324 | 0.9478 |  | 0.9756 | 0.9936 | 0.9091 | 0.9412 | 0.9995 |  | 0.9756 | 0.9952 | 0.9302 | 0.9524 | 0.9996 |
| 8Pso | 0.9016 | 0.9736 | 0.7746 | 0.8333 | 0.9699 |  | 0.9508 | 0.9967 | 0.9667 | 0.9587 | 0.9934 |  | 0.8197 | 0.9851 | 0.8475 | 0.8333 | 0.9870 |  | 0.9016 | 0.9769 | 0.7971 | 0.8462 | 0.9922 |  | 1.0000 | 0.9785 | 0.8243 | 0.9037 | 1.0000 |  | 1.0000 | 0.9686 | 0.7625 | 0.8652 | 0.9994 |
| 9Ecz | 0.7407 | 0.9772 | 0.7407 | 0.7407 | 0.9620 |  | 0.5556 | 0.9853 | 0.7692 | 0.6452 | 0.9539 |  | 0.7037 | 0.9739 | 0.7037 | 0.7037 | 0.9776 |  | 0.6481 | 0.9837 | 0.7778 | 0.7071 | 0.9748 |  | 0.7963 | 1.0000 | 1.0000 | 0.8866 | 0.9989 |  | 0.5741 | 1.0000 | 1.0000 | 0.7294 | 0.9944 |
| 10Vas | 0.8947 | 0.9730 | 0.6667 | 0.7640 | 0.9886 |  | 1.0000 | 0.9730 | 0.6909 | 0.8172 | 0.9893 |  | 0.8158 | 0.9889 | 0.8158 | 0.8158 | 0.9803 |  | 0.8421 | 0.9968 | 0.9412 | 0.8889 | 0.9673 |  | 0.9211 | 1.0000 | 1.0000 | 0.9589 | 0.9995 |  | 0.9211 | 1.0000 | 1.0000 | 0.9589 | 0.9990 |
| 11Ros | 1.0000 | 1.0000 | 1.0000 | 1.0000 | 0.9989 |  | 0.9767 | 1.0000 | 1.0000 | 0.9882 | 0.9998 |  | 0.8837 | 0.9920 | 0.8837 | 0.8837 | 0.9953 |  | 0.8372 | 0.9936 | 0.9000 | 0.8675 | 0.9921 |  | 0.9767 | 0.9984 | 0.9767 | 0.9767 | 0.9999 |  | 1.0000 | 0.9984 | 0.9773 | 0.9885 | 0.9999 |
| 12DM | 0.7500 | 0.9903 | 0.8571 | 0.8000 | 0.9281 |  | 0.7500 | 0.9838 | 0.7826 | 0.7660 | 0.9754 |  | 0.8125 | 0.9725 | 0.6964 | 0.7500 | 0.9856 |  | 0.7708 | 0.9887 | 0.8409 | 0.8043 | 0.9851 |  | 0.8958 | 0.9968 | 0.9556 | 0.9247 | 0.9981 |  | 0.9167 | 1.0000 | 1.0000 | 0.9565 | 0.9995 |
| Ave | 0.7325 | 0.9751 | 0.7214 | 0.7109 | 0.9560 |  | 0.7594 | 0.9790 | 0.7652 | 0.7500 | 0.9755 |  | 0.7894 | 0.9814 | 0.7902 | 0.7864 | 0.9759 |  | 0.8177 | 0.9843 | 0.8294 | 0.8201 | 0.9795 |  | 0.9005 | 0.9908 | 0.9192 | 0.9051 | 0.9931 |  | 0.9116 | 0.9921 | 0.9281 | 0.9128 | 0.9956 |

**Extended Data Table 2 | Sensitivity, specificity, precision, F1 score and AUC for single-modal, dual-modal and MMDLS 13 classifications.**

| Dataset | Case number | Sex (Female/Male) | Age (Mean±Std. Deviation yr.-old) |
| --- | --- | --- | --- |
| Test | 76 | 45/31 | 41.25±15.57 |
| Train | 310 | 181/129 | 42.01±17.12 |

**Extended Data Table 3 | Baseline Characteristics of Testing and Training dataset.**

| Diagnosis | Case number (Test/Train) | Sex (Female/Male) | Age (Mean±Std. Deviation yr.-old) |
| --- | --- | --- | --- |
| NC | 4/16 | 10/10 | 35.00±19.54 |
| DLE | 7/32 | 20/19 | 43.41±13.22 |
| A-SCLE | 7/27 | 27/7 | 32.79±17.64 |
| P-SCLE | 5/21 | 15/11 | 47.15±19.10 |
| SLE | 8/31 | 29/10 | 36.92±15.68 |
| LP | 6/26 | 14/18 | 47.47±17.08 |
| EAC | 5/19 | 21/3 | 36.50±14.92 |
| EM | 6/25 | 15/16 | 41.06±18.60 |
| Pso | 5/30 | 7/28 | 39.06±14.27 |
| Ecz | 6/23 | 9/20 | 49.45±18.63 |
| Vas | 5/21 | 24/2 | 37.50±16.40 |
| Ros | 5/21 | 16/10 | 47.46±9.811 |
| DM | 5/20 | 21/4 | 52.20±15.68 |

**Extended Data Table 4 | Baseline Characteristics of 13 classifications.**

| **Anonymous**  **ID** | **Diagnosis** | **Sex** | **Age**  (yr.-old) | **2019 EULAR/ ACR Score** | **Dataset** |
| --- | --- | --- | --- | --- | --- |
| 1 | NC | Male | 18 | 0 | Train |
| 2 | NC | Female | 57 | 0 | Test |
| 3 | NC | Female | 45 | 0 | Train |
| 4 | NC | Female | 31 | 0 | Train |
| 5 | NC | Male | 29 | 0 | Train |
| 6 | NC | Female | 44 | 0 | Train |
| 7 | NC | Male | 23 | 0 | Train |
| 8 | NC | Female | 67 | 0 | Train |
| 9 | NC | Female | 12 | 0 | Test |
| 10 | NC | Female | 8 | 0 | Train |
| 11 | NC | Male | 52 | 0 | Train |
| 12 | NC | Male | 11 | 0 | Test |
| 13 | NC | Male | 9 | 0 | Train |
| 14 | NC | Female | 27 | 0 | Train |
| 15 | NC | Male | 79 | 0 | Test |
| 16 | NC | Male | 33 | 0 | Train |
| 17 | NC | Female | 36 | 0 | Train |
| 18 | NC | Male | 47 | 0 | Train |
| 19 | NC | Female | 28 | 0 | Train |
| 20 | NC | Male | 44 | 0 | Train |
| 21 | DLE | Female | 60 | 7 | Train |
| 22 | DLE | Male | 60 | 4 | Train |
| 23 | DLE | Female | 36 | 4 | Test |
| 24 | DLE | Male | 28 | 4 | Train |
| 25 | DLE | Male | 45 | 0 | Train |
| 26 | DLE | Male | 23 | 0 | Test |
| 27 | DLE | Female | 71 | 4 | Train |
| 28 | DLE | Male | 24 | 0 | Train |
| 29 | DLE | Female | 61 | 0 | Train |
| 30 | DLE | Male | 47 | 0 | Train |
| 31 | DLE | Female | 29 | 0 | Train |
| 32 | DLE | Female | 30 | 0 | Train |
| 33 | DLE | Female | 54 | 0 | Train |
| 34 | DLE | Female | 45 | 4 | Test |
| 35 | DLE | Male | 43 | 0 | Train |
| 36 | DLE | Male | 46 | 0 | Test |
| 37 | DLE | Male | 23 | 0 | Train |
| 38 | DLE | Male | 28 | 0 | Train |
| 39 | DLE | Male | 67 | 4 | Train |
| 40 | DLE | Male | 37 | 7 | Train |
| 41 | DLE | Female | 46 | 4 | Test |
| 42 | DLE | Female | 41 | 0 | Train |
| 43 | DLE | Female | 53 | 8 | Train |
| 44 | DLE | Male | 29 | 0 | Train |
| 45 | DLE | Female | 63 | 0 | Train |
| 46 | DLE | Male | 57 | 0 | Train |
| 47 | DLE | Female | 27 | 0 | Test |
| 48 | DLE | Male | 33 | 0 | Train |
| 49 | DLE | Female | 46 | 0 | Train |
| 50 | DLE | Male | 36 | 0 | Train |
| 51 | DLE | Female | 48 | 0 | Train |
| 52 | DLE | Female | 34 | 0 | Train |
| 53 | DLE | Male | 33 | 0 | Train |
| 54 | DLE | Male | 52 | 0 | Test |
| 55 | DLE | Female | 48 | 7 | Train |
| 56 | DLE | Female | 29 | 4 | Train |
| 57 | DLE | Male | 54 | 0 | Train |
| 58 | DLE | Female | 55 | 4 | Train |
| 59 | DLE | Female | 52 | 0 | Train |
| 60 | A-SCLE | Female | 25 | 0 | Train |
| 61 | A-SCLE | Female | 28 | 10 | Test |
| 62 | A-SCLE | Female | 45 | 7 | Train |
| 63 | A-SCLE | Female | 27 | 14 | Train |
| 64 | A-SCLE | Male | 20 | 4 | Train |
| 65 | A-SCLE | Male | 58 | 4 | Test |
| 66 | A-SCLE | Female | 30 | 0 | Train |
| 67 | A-SCLE | Female | 45 | 4 | Train |
| 68 | A-SCLE | Female | 32 | 4 | Train |
| 69 | A-SCLE | Female | 20 | 4 | Train |
| 70 | A-SCLE | Female | 22 | 10 | Train |
| 71 | A-SCLE | Female | 28 | 4 | Test |
| 72 | A-SCLE | Male | 26 | 10 | Train |
| 73 | A-SCLE | Female | 32 | 4 | Test |
| 74 | A-SCLE | Female | 34 | 4 | Train |
| 75 | A-SCLE | Female | 21 | 13 | Train |
| 76 | A-SCLE | Male | 29 | 10 | Train |
| 77 | A-SCLE | Female | 27 | 7 | Train |
| 78 | A-SCLE | Female | 20 | 0 | Train |
| 79 | A-SCLE | Female | 9 | 7 | Train |
| 80 | A-SCLE | Female | 12 | 4 | Train |
| 81 | A-SCLE | Female | 46 | 0 | Test |
| 82 | A-SCLE | Female | 35 | 14 | Train |
| 83 | A-SCLE | Female | 44 | 4 | Train |
| 84 | A-SCLE | Female | 51 | 0 | Train |
| 85 | A-SCLE | Female | 49 | 4 | Train |
| 86 | A-SCLE | Female | 32 | 4 | Train |
| 87 | A-SCLE | Male | 21 | 4 | Train |
| 88 | A-SCLE | Female | 57 | 4 | Train |
| 89 | A-SCLE | Male | 72 | 7 | Train |
| 90 | A-SCLE | Female | 23 | 7 | Test |
| 91 | A-SCLE | Female | 52 | 4 | Train |
| 92 | A-SCLE | Female | 10 | 7 | Test |
| 93 | A-SCLE | Male | 33 | 4 | Train |
| 94 | P-SCLE | Female | 36 | 0 | Test |
| 95 | P-SCLE | Female | 51 | 4 | Train |
| 96 | P-SCLE | Male | 17 | 0 | Train |
| 97 | P-SCLE | Male | 71 | 11 | Train |
| 98 | P-SCLE | Female | 29 | 16 | Train |
| 99 | P-SCLE | Male | 59 | 11 | Train |
| 100 | P-SCLE | Male | 72 | 4 | Train |
| 101 | P-SCLE | Female | 37 | 13 | Train |
| 102 | P-SCLE | Male | 58 | 7 | Train |
| 103 | P-SCLE | Female | 21 | 10 | Train |
| 104 | P-SCLE | Male | 62 | 4 | Train |
| 105 | P-SCLE | Male | 44 | 7 | Train |
| 106 | P-SCLE | Female | 41 | 4 | Train |
| 107 | P-SCLE | Male | 23 | 4 | Test |
| 108 | P-SCLE | Female | 72 | 4 | Test |
| 109 | P-SCLE | Female | 27 | 4 | Train |
| 110 | P-SCLE | Male | 60 | 4 | Test |
| 111 | P-SCLE | Male | 37 | 4 | Train |
| 112 | P-SCLE | Female | 78 | 7 | Train |
| 113 | P-SCLE | Male | 72 | 4 | Train |
| 114 | P-SCLE | Female | 31 | 8 | Train |
| 115 | P-SCLE | Female | 13 | 4 | Train |
| 116 | P-SCLE | Female | 57 | 4 | Train |
| 117 | P-SCLE | Female | 51 | 4 | Test |
| 118 | P-SCLE | Female | 44 | 7 | Train |
| 119 | P-SCLE | Female | 63 | 4 | Train |
| 120 | SLE | Female | 50 | 9 | Train |
| 121 | SLE | Female | 8 | 15 | Train |
| 122 | SLE | Female | 26 | 16 | Test |
| 123 | SLE | Male | 42 | 22 | Train |
| 124 | SLE | Male | 21 | 20 | Test |
| 125 | SLE | Female | 8 | 20 | Train |
| 126 | SLE | Male | 15 | 23 | Train |
| 127 | SLE | Female | 61 | 16 | Train |
| 128 | SLE | Male | 55 | 12 | Train |
| 129 | SLE | Female | 65 | 20 | Train |
| 130 | SLE | Female | 32 | 19 | Train |
| 131 | SLE | Female | 34 | 20 | Test |
| 132 | SLE | Female | 46 | 18 | Train |
| 133 | SLE | Male | 18 | 23 | Train |
| 134 | SLE | Female | 37 | 33 | Train |
| 135 | SLE | Female | 37 | 24 | Test |
| 136 | SLE | Female | 27 | 19 | Train |
| 137 | SLE | Female | 44 | 12 | Train |
| 138 | SLE | Female | 55 | 12 | Train |
| 139 | SLE | Female | 17 | 30 | Train |
| 140 | SLE | Female | 28 | 23 | Train |
| 141 | SLE | Female | 37 | 17 | Train |
| 142 | SLE | Female | 16 | 24 | Train |
| 143 | SLE | Male | 69 | 31 | Train |
| 144 | SLE | Male | 29 | 20 | Train |
| 145 | SLE | Female | 45 | 18 | Train |
| 146 | SLE | Female | 53 | 16 | Train |
| 147 | SLE | Female | 36 | 23 | Test |
| 148 | SLE | Female | 24 | 38 | Test |
| 149 | SLE | Female | 43 | 13 | Train |
| 150 | SLE | Female | 43 | 23 | Test |
| 151 | SLE | Female | 47 | 19 | Train |
| 152 | SLE | Female | 47 | 24 | Train |
| 153 | SLE | Female | 16 | 37 | Train |
| 154 | SLE | Male | 55 | 23 | Train |
| 155 | SLE | Female | 50 | 21 | Train |
| 156 | SLE | Male | 25 | 19 | Train |
| 157 | SLE | Female | 32 | 20 | Test |
| 158 | SLE | Male | 47 | 25 | Train |
| 159 | LP | Male | 53 | 0 | Train |
| 160 | LP | Female | 41 | 0 | Train |
| 161 | LP | Female | 58 | 0 | Test |
| 162 | LP | Female | 66 | 0 | Train |
| 163 | LP | Male | 65 | 0 | Train |
| 164 | LP | Male | 51 | 0 | Test |
| 165 | LP | Female | 51 | 0 | Train |
| 166 | LP | Male | 15 | 0 | Train |
| 167 | LP | Male | 57 | 0 | Train |
| 168 | LP | Male | 10 | 0 | Train |
| 169 | LP | Female | 52 | 0 | Train |
| 170 | LP | Male | 21 | 0 | Train |
| 171 | LP | Male | 42 | 0 | Train |
| 172 | LP | Male | 37 | 0 | Test |
| 173 | LP | Female | 79 | 0 | Train |
| 174 | LP | Female | 43 | 0 | Train |
| 175 | LP | Male | 50 | 0 | Test |
| 176 | LP | Male | 75 | 0 | Train |
| 177 | LP | Female | 59 | 0 | Train |
| 178 | LP | Male | 48 | 0 | Train |
| 179 | LP | Female | 32 | 0 | Train |
| 180 | LP | Female | 29 | 0 | Train |
| 181 | LP | Male | 21 | 0 | Train |
| 182 | LP | Female | 48 | 0 | Train |
| 183 | LP | Male | 36 | 0 | Test |
| 184 | LP | Female | 41 | 0 | Test |
| 185 | LP | Female | 65 | 0 | Train |
| 186 | LP | Male | 55 | 0 | Train |
| 187 | LP | Male | 49 | 0 | Train |
| 188 | LP | Male | 34 | 0 | Train |
| 189 | LP | Female | 65 | 0 | Train |
| 190 | LP | Male | 71 | 0 | Train |
| 191 | EAC | Female | 15 | 0 | Train |
| 192 | EAC | Female | 32 | 0 | Train |
| 193 | EAC | Female | 16 | 0 | Test |
| 194 | EAC | Male | 41 | 0 | Train |
| 195 | EAC | Male | 41 | 0 | Train |
| 196 | EAC | Female | 49 | 0 | Train |
| 197 | EAC | Female | 37 | 0 | Train |
| 198 | EAC | Female | 36 | 0 | Test |
| 199 | EAC | Female | 42 | 0 | Train |
| 200 | EAC | Female | 43 | 0 | Train |
| 201 | EAC | Female | 27 | 0 | Train |
| 202 | EAC | Female | 74 | 0 | Train |
| 203 | EAC | Female | 54 | 0 | Train |
| 204 | EAC | Female | 30 | 0 | Test |
| 205 | EAC | Female | 27 | 0 | Test |
| 206 | EAC | Female | 22 | 0 | Train |
| 207 | EAC | Female | 39 | 0 | Train |
| 208 | EAC | Female | 19 | 0 | Train |
| 209 | EAC | Female | 48 | 0 | Train |
| 210 | EAC | Female | 20 | 0 | Train |
| 211 | EAC | Male | 67 | 0 | Train |
| 212 | EAC | Female | 31 | 0 | Test |
| 213 | EAC | Female | 26 | 0 | Train |
| 214 | EAC | Female | 40 | 0 | Train |
| 215 | EM | Male | 26 | 0 | Train |
| 216 | EM | Female | 27 | 0 | Train |
| 217 | EM | Male | 41 | 0 | Test |
| 218 | EM | Male | 34 | 0 | Train |
| 219 | EM | Female | 40 | 0 | Train |
| 220 | EM | Female | 61 | 0 | Train |
| 221 | EM | Female | 12 | 0 | Train |
| 222 | EM | Female | 62 | 0 | Train |
| 223 | EM | Male | 52 | 0 | Train |
| 224 | EM | Female | 56 | 0 | Train |
| 225 | EM | Male | 64 | 0 | Train |
| 226 | EM | Male | 22 | 0 | Train |
| 227 | EM | Female | 6 | 0 | Train |
| 228 | EM | Male | 29 | 0 | Train |
| 229 | EM | Male | 53 | 0 | Test |
| 230 | EM | Male | 37 | 0 | Train |
| 231 | EM | Male | 47 | 0 | Train |
| 232 | EM | Male | 51 | 0 | Train |
| 233 | EM | Female | 32 | 0 | Test |
| 234 | EM | Female | 50 | 0 | Train |
| 235 | EM | Female | 6 | 0 | Train |
| 236 | EM | Female | 27 | 0 | Train |
| 237 | EM | Female | 65 | 0 | Train |
| 238 | EM | Male | 69 | 0 | Train |
| 239 | EM | Male | 28 | 0 | Train |
| 240 | EM | Female | 50 | 0 | Test |
| 241 | EM | Female | 43 | 0 | Train |
| 242 | EM | Male | 73 | 0 | Test |
| 243 | EM | Male | 63 | 0 | Train |
| 244 | EM | Female | 26 | 0 | Test |
| 245 | EM | Male | 21 | 0 | Train |
| 246 | Pso | Male | 4 | 0 | Train |
| 247 | Pso | Female | 25 | 0 | Train |
| 248 | Pso | Male | 59 | 0 | Test |
| 249 | Pso | Female | 7 | 0 | Train |
| 250 | Pso | Male | 55 | 0 | Train |
| 251 | Pso | Male | 49 | 0 | Train |
| 252 | Pso | Male | 33 | 0 | Test |
| 253 | Pso | Male | 44 | 0 | Train |
| 254 | Pso | Male | 30 | 0 | Train |
| 255 | Pso | Male | 42 | 0 | Train |
| 256 | Pso | Male | 63 | 0 | Train |
| 257 | Pso | Male | 26 | 0 | Train |
| 258 | Pso | Male | 26 | 0 | Train |
| 259 | Pso | Male | 22 | 0 | Test |
| 260 | Pso | Male | 47 | 0 | Train |
| 261 | Pso | Male | 61 | 0 | Train |
| 262 | Pso | Male | 45 | 0 | Test |
| 263 | Pso | Male | 53 | 0 | Train |
| 264 | Pso | Male | 33 | 0 | Train |
| 265 | Pso | Male | 44 | 0 | Train |
| 266 | Pso | Female | 27 | 0 | Train |
| 267 | Pso | Male | 42 | 0 | Train |
| 268 | Pso | Female | 54 | 0 | Train |
| 269 | Pso | Male | 38 | 0 | Train |
| 270 | Pso | Male | 39 | 0 | Train |
| 271 | Pso | Male | 41 | 0 | Test |
| 272 | Pso | Female | 42 | 0 | Train |
| 273 | Pso | Male | 39 | 0 | Test |
| 274 | Pso | Male | 35 | 0 | Train |
| 275 | Pso | Male | 54 | 0 | Train |
| 276 | Pso | Male | 47 | 0 | Train |
| 277 | Pso | Male | 16 | 0 | Train |
| 278 | Pso | Male | 28 | 0 | Train |
| 279 | Pso | Male | 47 | 0 | Train |
| 280 | Pso | Male | 50 | 0 | Test |
| 281 | Ecz | Male | 60 | 0 | Train |
| 282 | Ecz | Male | 85 | 0 | Train |
| 283 | Ecz | Male | 23 | 0 | Test |
| 284 | Ecz | Male | 25 | 0 | Train |
| 285 | Ecz | Male | 60 | 0 | Train |
| 286 | Ecz | Male | 60 | 0 | Train |
| 287 | Ecz | Female | 51 | 0 | Test |
| 288 | Ecz | Male | 48 | 0 | Train |
| 289 | Ecz | Female | 17 | 0 | Train |
| 290 | Ecz | Male | 25 | 0 | Train |
| 291 | Ecz | Female | 58 | 0 | Train |
| 292 | Ecz | Male | 65 | 0 | Train |
| 293 | Ecz | Female | 58 | 0 | Train |
| 294 | Ecz | Female | 61 | 0 | Test |
| 295 | Ecz | Male | 33 | 0 | Train |
| 296 | Ecz | Male | 25 | 0 | Test |
| 297 | Ecz | Female | 63 | 0 | Test |
| 298 | Ecz | Female | 48 | 0 | Train |
| 299 | Ecz | Male | 36 | 0 | Train |
| 300 | Ecz | Male | 28 | 0 | Train |
| 301 | Ecz | Male | 50 | 0 | Train |
| 302 | Ecz | Male | 21 | 0 | Train |
| 303 | Ecz | Female | 37 | 0 | Train |
| 304 | Ecz | Male | 57 | 0 | Train |
| 305 | Ecz | Male | 58 | 0 | Test |
| 306 | Ecz | Female | 63 | 0 | Train |
| 307 | Ecz | Male | 72 | 0 | Train |
| 308 | Ecz | Male | 76 | 0 | Train |
| 309 | Ecz | Male | 71 | 0 | Train |
| 310 | Vas | Female | 35 | 0 | Train |
| 311 | Vas | Female | 45 | 0 | Test |
| 312 | Vas | Female | 53 | 0 | Test |
| 313 | Vas | Female | 20 | 0 | Train |
| 314 | Vas | Female | 11 | 0 | Train |
| 315 | Vas | Male | 28 | 0 | Train |
| 316 | Vas | Female | 49 | 0 | Train |
| 317 | Vas | Female | 17 | 0 | Train |
| 318 | Vas | Female | 55 | 0 | Train |
| 319 | Vas | Female | 27 | 0 | Train |
| 320 | Vas | Female | 64 | 0 | Train |
| 321 | Vas | Female | 61 | 0 | Train |
| 322 | Vas | Female | 28 | 0 | Train |
| 323 | Vas | Female | 59 | 0 | Test |
| 324 | Vas | Female | 29 | 0 | Train |
| 325 | Vas | Female | 24 | 0 | Train |
| 326 | Vas | Female | 56 | 0 | Train |
| 327 | Vas | Female | 57 | 0 | Train |
| 328 | Vas | Female | 44 | 0 | Train |
| 329 | Vas | Female | 22 | 0 | Train |
| 330 | Vas | Female | 19 | 0 | Train |
| 331 | Vas | Female | 41 | 0 | Train |
| 332 | Vas | Female | 57 | 0 | Train |
| 333 | Vas | Female | 25 | 0 | Test |
| 334 | Vas | Male | 30 | 0 | Test |
| 335 | Vas | Female | 19 | 0 | Train |
| 336 | Ros | Female | 28 | 0 | Train |
| 337 | Ros | Female | 48 | 0 | Train |
| 338 | Ros | Female | 42 | 0 | Test |
| 339 | Ros | Female | 55 | 0 | Test |
| 340 | Ros | Male | 41 | 0 | Test |
| 341 | Ros | Female | 51 | 0 | Test |
| 342 | Ros | Female | 47 | 0 | Train |
| 343 | Ros | Female | 63 | 0 | Train |
| 344 | Ros | Male | 38 | 0 | Train |
| 345 | Ros | Male | 62 | 0 | Train |
| 346 | Ros | Female | 45 | 0 | Train |
| 347 | Ros | Female | 57 | 0 | Train |
| 348 | Ros | Female | 44 | 0 | Train |
| 349 | Ros | Female | 38 | 0 | Train |
| 350 | Ros | Female | 53 | 0 | Train |
| 351 | Ros | Female | 52 | 0 | Train |
| 352 | Ros | Male | 31 | 0 | Train |
| 353 | Ros | Female | 55 | 0 | Train |
| 354 | Ros | Male | 53 | 0 | Train |
| 355 | Ros | Male | 43 | 0 | Train |
| 356 | Ros | Female | 50 | 0 | Train |
| 357 | Ros | Male | 62 | 0 | Train |
| 358 | Ros | Male | 32 | 0 | Test |
| 359 | Ros | Male | 53 | 0 | Train |
| 360 | Ros | Male | 56 | 0 | Train |
| 361 | Ros | Female | 35 | 0 | Train |
| 362 | DM | Female | 50 | 0 | Train |
| 363 | DM | Female | 68 | 0 | Test |
| 364 | DM | Female | 71 | 0 | Test |
| 365 | DM | Female | 17 | 0 | Train |
| 366 | DM | Female | 51 | 0 | Train |
| 367 | DM | Female | 62 | 0 | Train |
| 368 | DM | Male | 65 | 0 | Train |
| 369 | DM | Female | 52 | 0 | Train |
| 370 | DM | Female | 47 | 0 | Train |
| 371 | DM | Female | 73 | 0 | Train |
| 372 | DM | Female | 56 | 0 | Train |
| 373 | DM | Female | 50 | 0 | Train |
| 374 | DM | Male | 56 | 0 | Test |
| 375 | DM | Female | 44 | 0 | Train |
| 376 | DM | Male | 40 | 0 | Test |
| 377 | DM | Female | 48 | 0 | Train |
| 378 | DM | Female | 12 | 0 | Train |
| 379 | DM | Female | 78 | 0 | Train |
| 380 | DM | Male | 75 | 0 | Train |
| 381 | DM | Female | 45 | 0 | Train |
| 382 | DM | Female | 51 | 0 | Train |
| 383 | DM | Female | 53 | 0 | Train |
| 384 | DM | Female | 39 | 0 | Train |
| 385 | DM | Female | 55 | 0 | Test |
| 386 | DM | Female | 47 | 0 | Train |

**Extended Data Table 5 | Sample information of each case.**
